# Supplementary material
Source: MDPI journal article supplement (https://www.mdpi.com/2072-4292/14/12/2849)
Supplement: s1 [file s1]

# Estimation of canopy structure of field crops using Sentinel-2 bands with vegetation indices and machine learning algorithms

Xiaochen Zou<sup>1,\*</sup>, Sunan Zhu<sup>1</sup> and Matti Mõttus<sup>2</sup>

<sup>1</sup> School of Remote Sensing and Geomatics Engineering, Nanjing University of Information Science and Technology, Nanjing 210044, China

<sup>2</sup> VTT Technical Research Centre of Finland Ltd., P.O. Box 1000, FI-02044 VTT Espoo, Finland

\* Correspondence: [zouxiaochen902@126.com](mailto:zouxiaochen902@126.com); [xiaochen.zou@nuist.edu.cn](mailto:xiaochen.zou@nuist.edu.cn)

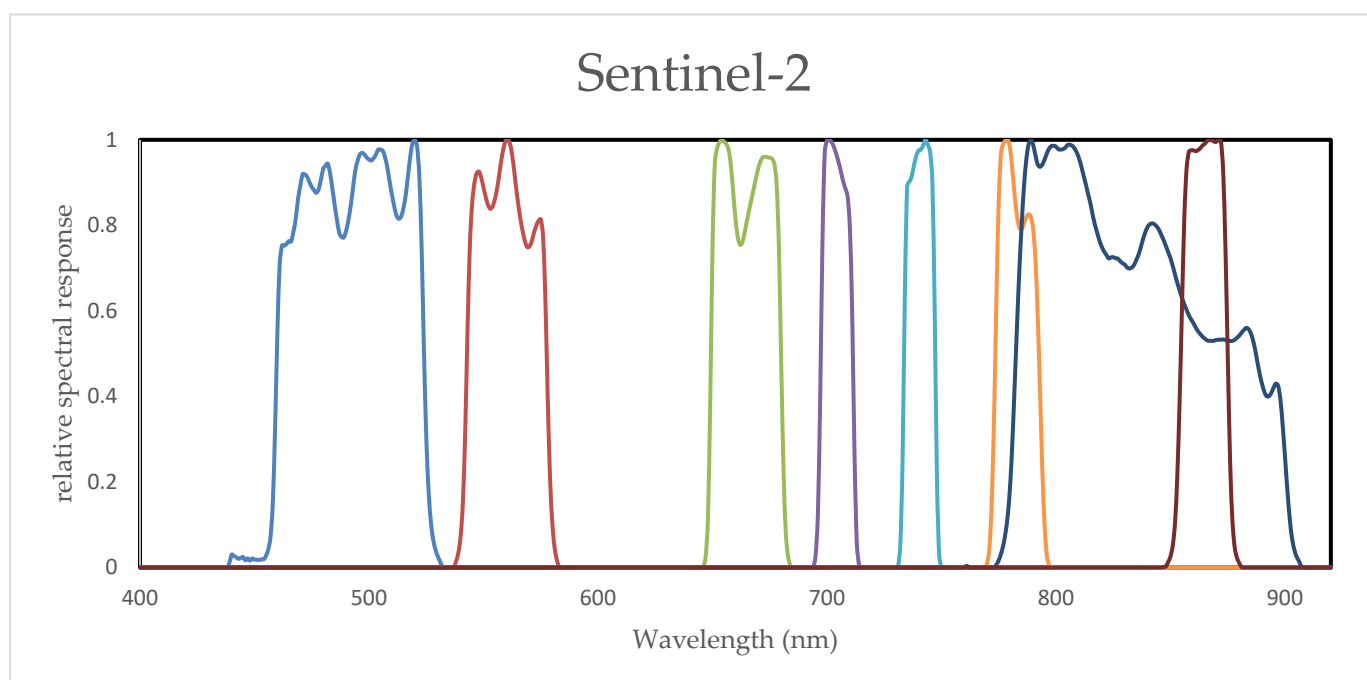

**Figure S1.** Eight Sentinel-2 spectral response functions used in this study.

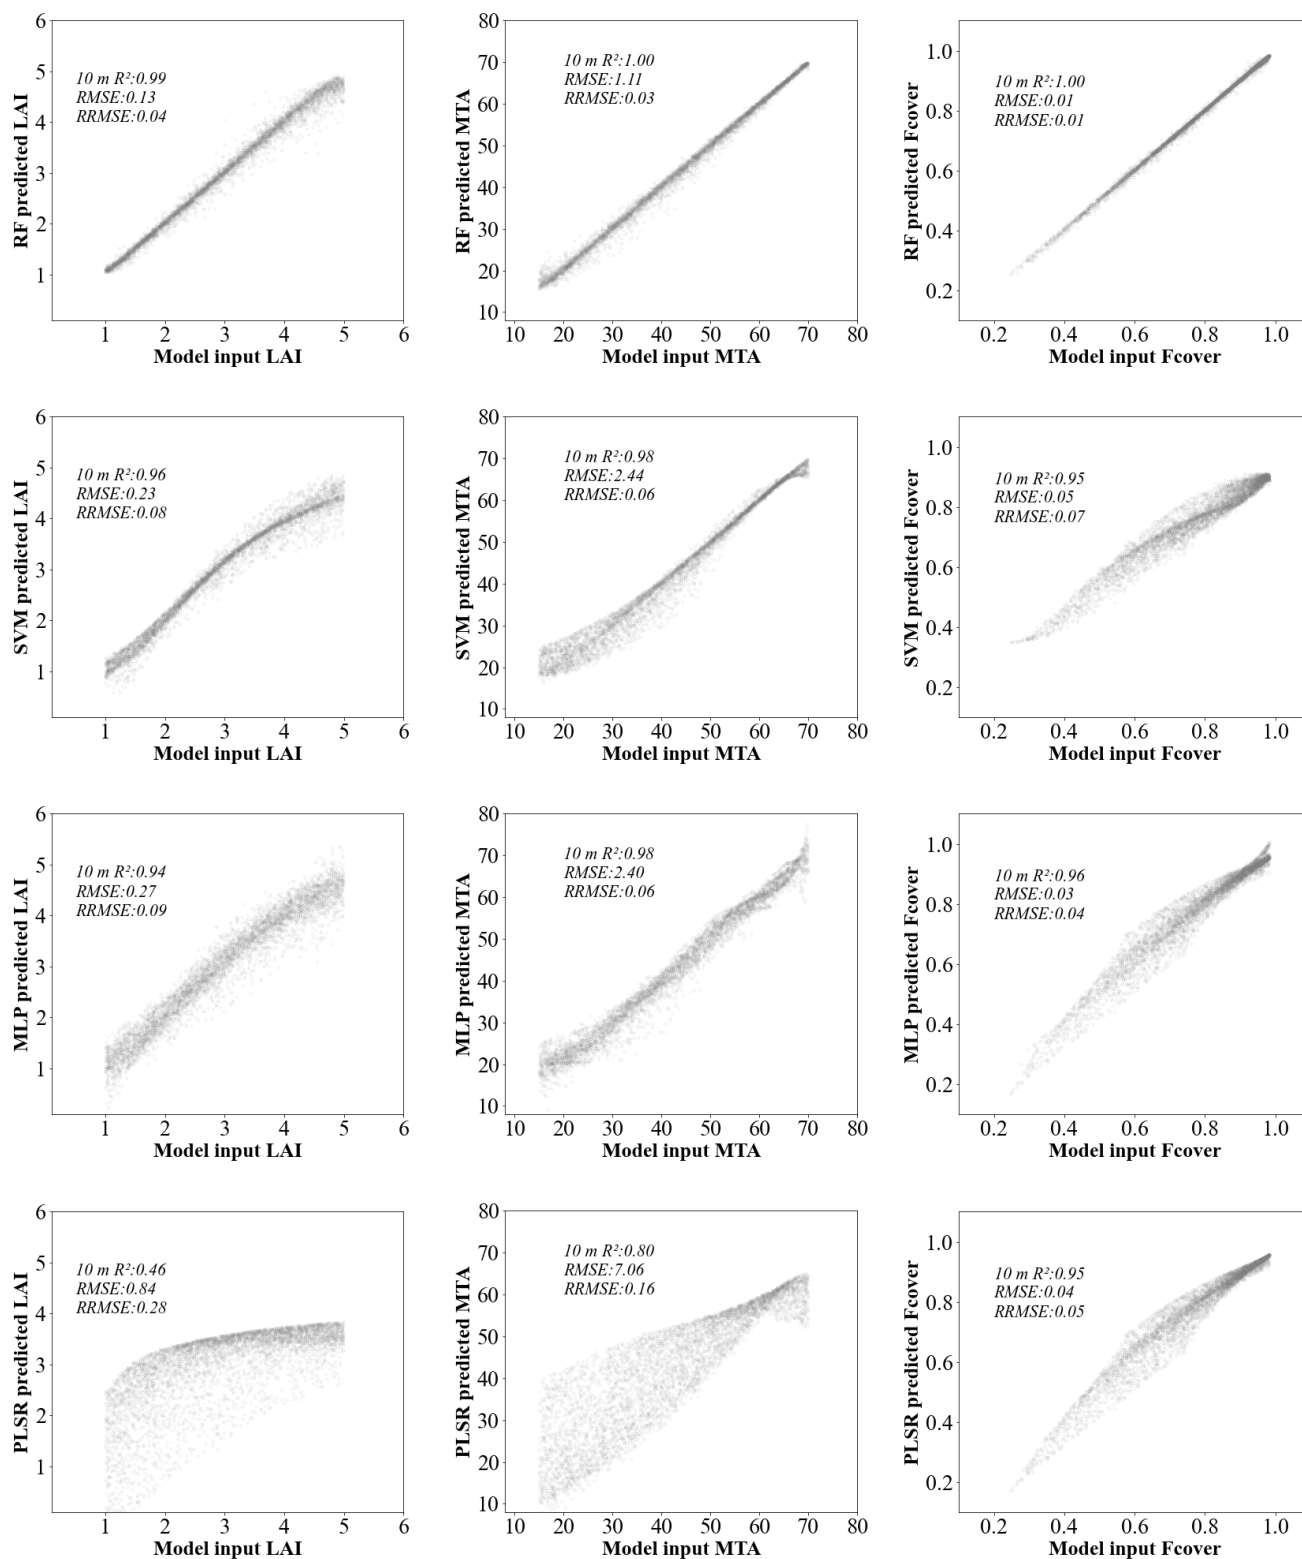

**Figure S2.** Canopy structure parameters estimated using the PROSAIL model simulated Sentinel-2 bands which have 10 m resolution.

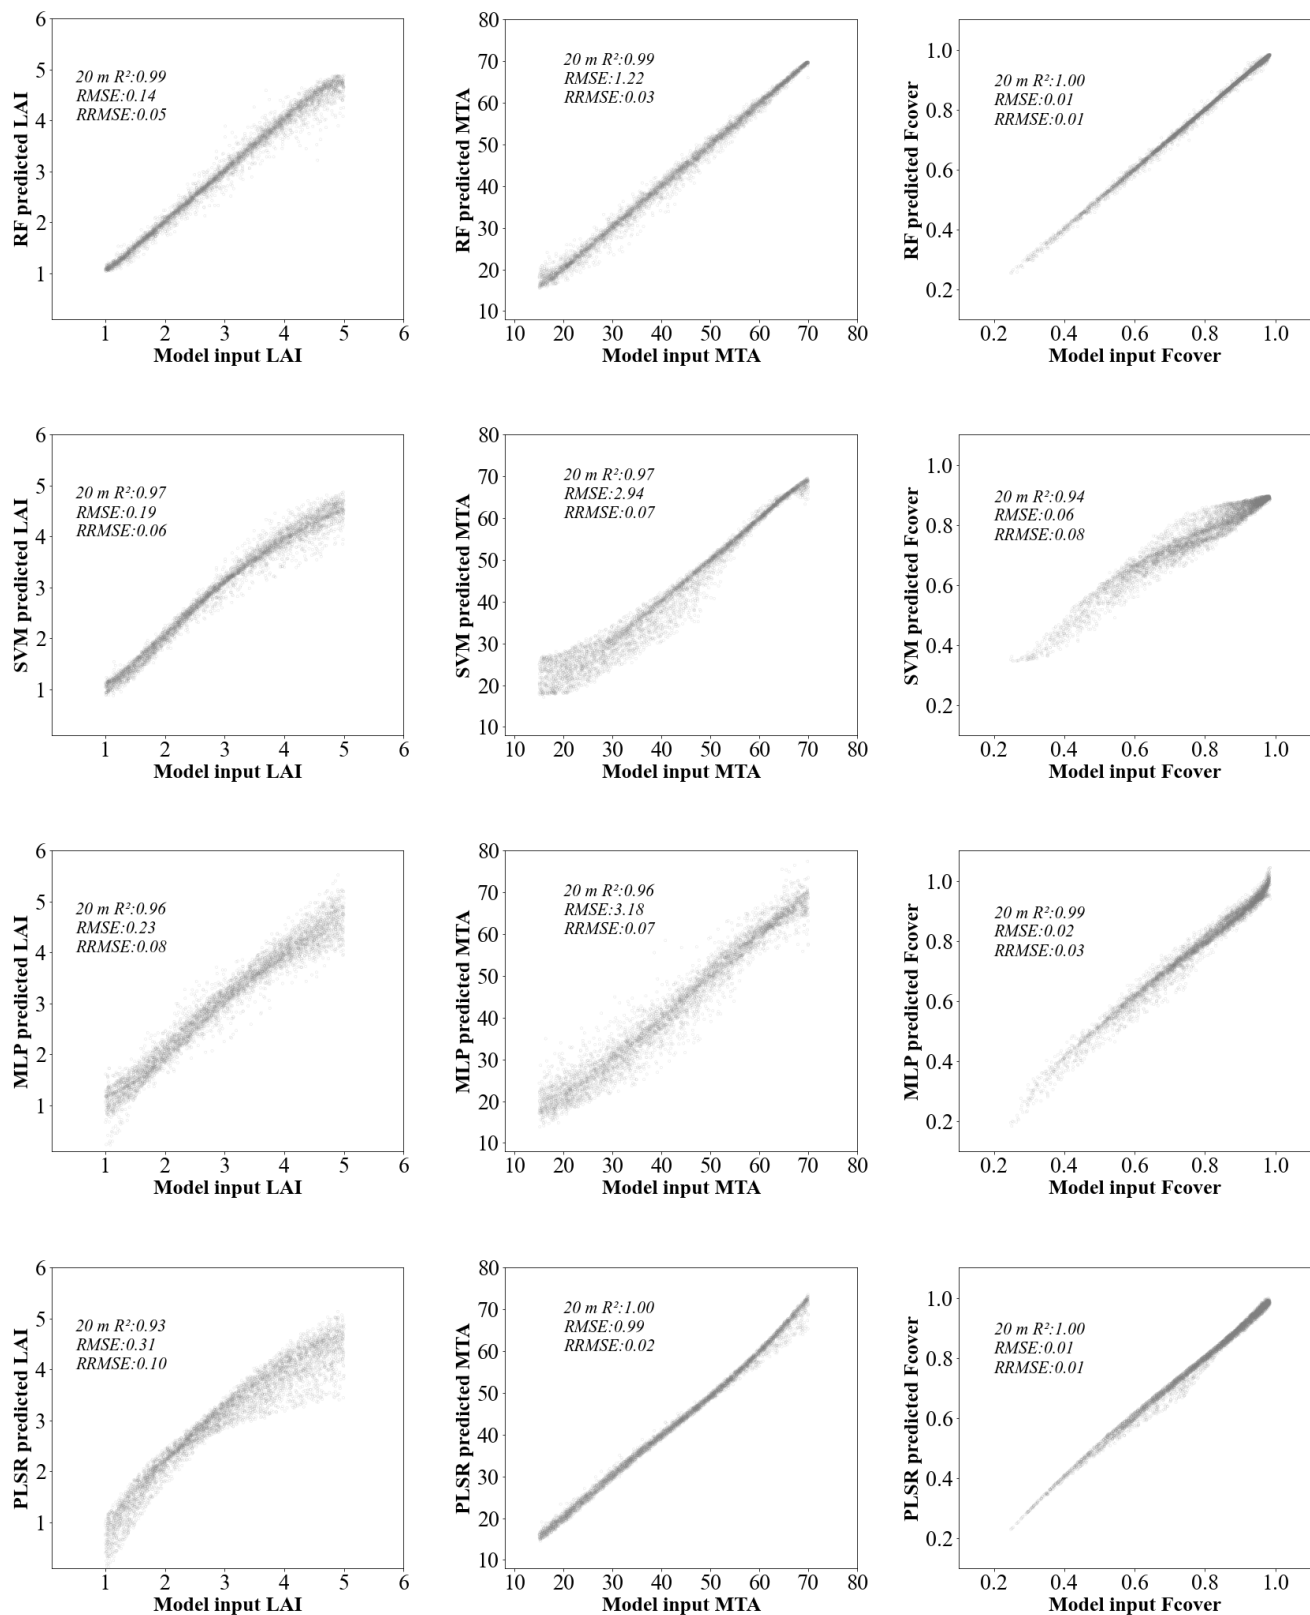

**Figure S3.** Canopy structure parameters estimated using the PROSAIL model simulated Sentinel-2 bands which have 20 m resolution.

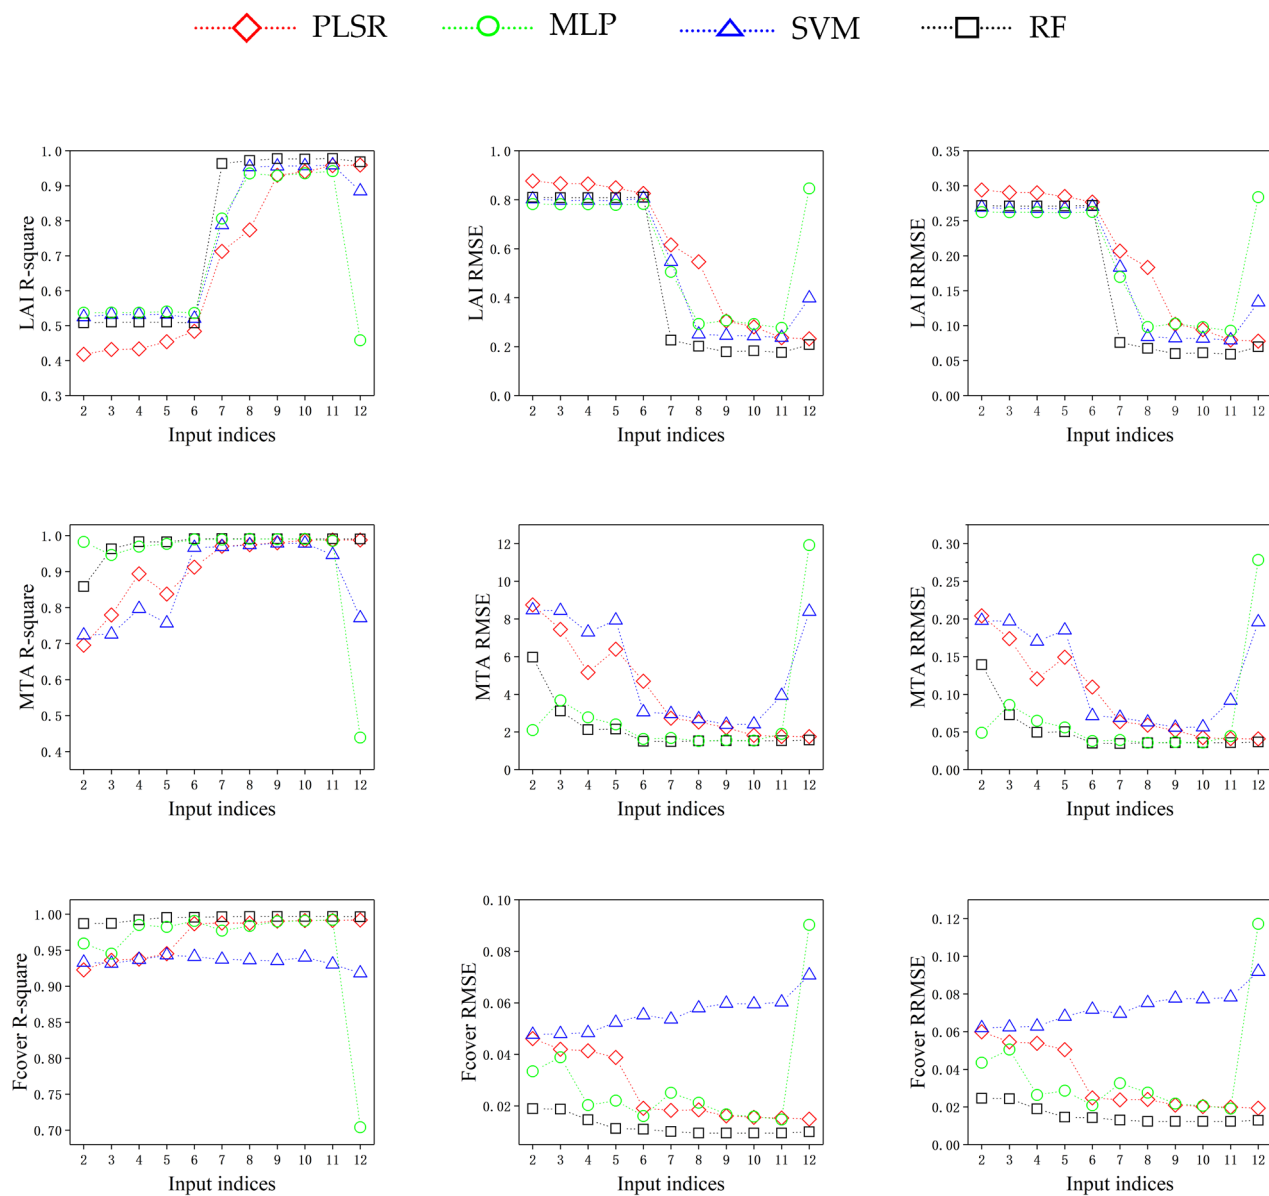

**Figure S4.** Effects of input vegetation indices on the model accuracy using the PROSAIL model simulations.

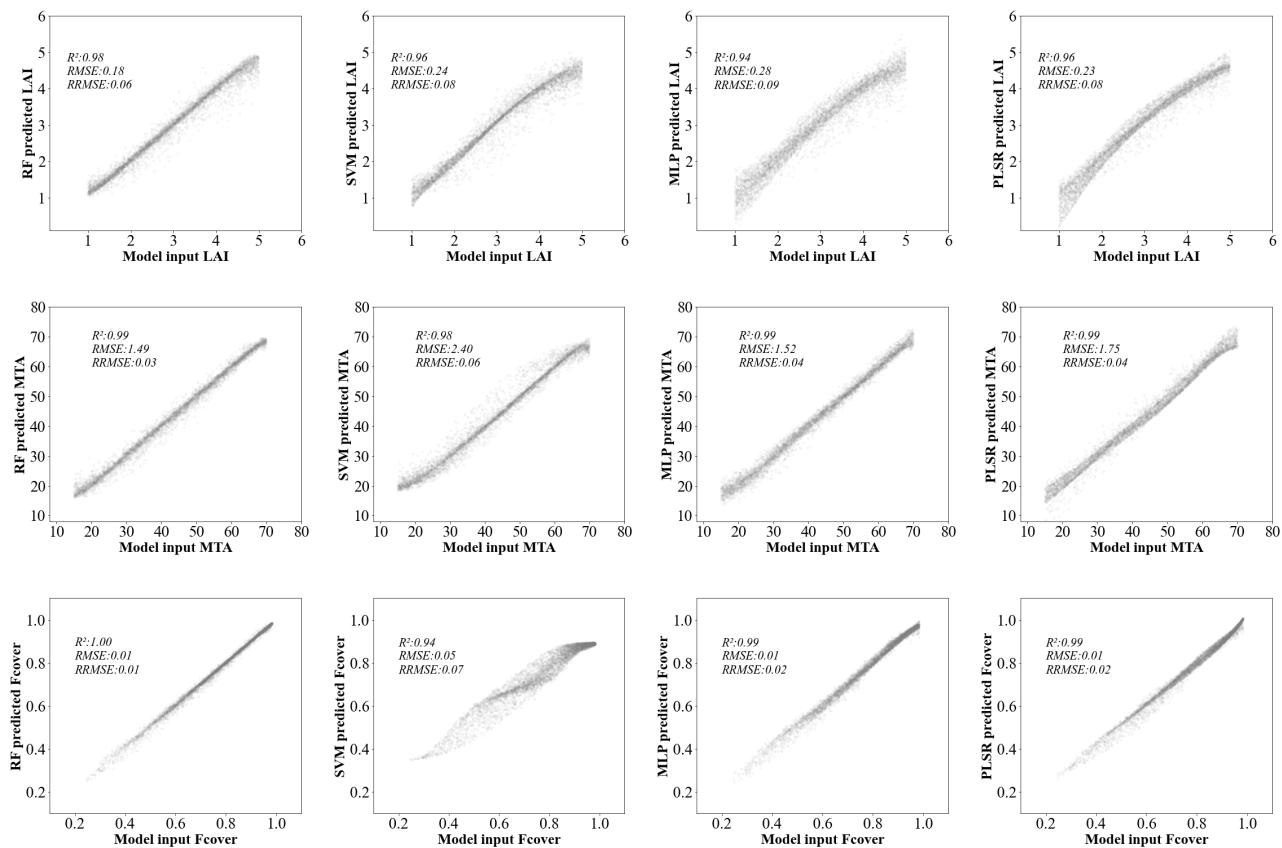

**Figure S5.** Performance of machine learning algorithms combined with optimized input indices using the PROSIAL model simulations.

**Table S1.** Statistics of estimated MTA data using simulated Sentinel-2 bands which have 10 m resolution.

| Species             | RF    |       |       |       | SVM   |       |       |      | MLP   |       |       |      | PLSR  |       |       |      |
|---------------------|-------|-------|-------|-------|-------|-------|-------|------|-------|-------|-------|------|-------|-------|-------|------|
|                     | Max   | Min   | Mean  | STD   | Max   | Min   | Mean  | STD  | Max   | Min   | Mean  | STD  | Max   | Min   | Mean  | STD  |
| Faba bean           | 34.09 | 25.13 | 27.14 | 1.18  | 34.75 | 26.34 | 28.42 | 1.69 | 27.80 | 25.78 | 26.94 | 0.46 | 36.35 | 22.45 | 29.59 | 2.82 |
| Narrow-leafed lupin | 46.02 | 20.15 | 28.63 | 10.29 | 37.54 | 31.79 | 34.81 | 2.07 | 29.06 | 18.32 | 22.31 | 4.37 | 42.15 | 35.38 | 39.03 | 2.46 |
| Turnip rape         | 33.30 | 33.06 | 33.12 | 0.10  | 43.56 | 43.44 | 43.49 | 0.04 | 32.47 | 31.37 | 31.86 | 0.41 | 16.53 | 15.42 | 16.20 | 0.46 |
| Oat                 | 56.20 | 50.29 | 54.06 | 2.30  | 54.10 | 52.70 | 53.25 | 0.56 | 58.11 | 53.08 | 55.40 | 1.94 | 50.61 | 46.61 | 48.19 | 1.53 |
| Barley              | 53.79 | 28.00 | 42.18 | 8.32  | 53.99 | 34.48 | 44.47 | 5.68 | 52.08 | 28.00 | 45.22 | 6.50 | 62.80 | 36.07 | 46.86 | 7.73 |
| Wheat               | 56.19 | 53.06 | 54.00 | 0.34  | 54.68 | 46.57 | 53.49 | 1.18 | 57.53 | 51.31 | 54.00 | 0.76 | 60.12 | 45.90 | 52.99 | 2.82 |

**Table S2.** Statistics of estimated MTA data using simulated Sentinel-2 bands which have 20 m resolution.

| Species             | RF    |       |       |      | SVM   |       |       |      | MLP   |       |       |      | PLSR  |       |       |      |
|---------------------|-------|-------|-------|------|-------|-------|-------|------|-------|-------|-------|------|-------|-------|-------|------|
|                     | Max   | Min   | Mean  | STD  |
| Faba bean           | 27.45 | 23.27 | 26.87 | 0.61 | 34.36 | 26.80 | 28.00 | 1.60 | 28.90 | 25.95 | 26.91 | 0.53 | 29.65 | 22.97 | 26.52 | 1.52 |
| Narrow-leafed lupin | 45.85 | 21.37 | 29.60 | 9.54 | 39.25 | 30.05 | 34.65 | 3.32 | 30.21 | 20.32 | 25.61 | 3.62 | 34.54 | 30.92 | 32.67 | 1.29 |
| Turnip rape         | 32.61 | 32.24 | 32.46 | 0.14 | 42.04 | 41.97 | 42.01 | 0.03 | 32.17 | 30.28 | 31.10 | 0.69 | 32.60 | 29.92 | 31.05 | 0.97 |
| Oat                 | 56.03 | 51.90 | 54.52 | 1.70 | 53.77 | 52.08 | 52.77 | 0.62 | 56.34 | 54.22 | 55.10 | 0.78 | 53.32 | 51.94 | 52.37 | 0.55 |
| Barley              | 53.87 | 26.66 | 44.03 | 7.74 | 53.30 | 32.29 | 43.55 | 6.29 | 54.00 | 37.90 | 46.70 | 4.44 | 52.99 | 42.54 | 45.67 | 2.90 |
| Wheat               | 56.62 | 52.57 | 53.99 | 0.39 | 54.22 | 46.48 | 53.75 | 0.85 | 54.58 | 49.21 | 53.87 | 0.57 | 60.92 | 46.60 | 53.94 | 2.20 |

**TableS3.** Statistics of estimated MTA data using machine learning algorithms combined with optimized input indices.

| Species             | RF    |       |       |      | SVM   |       |       |      | MLP   |       |       |      | PLSR  |       |       |      |
|---------------------|-------|-------|-------|------|-------|-------|-------|------|-------|-------|-------|------|-------|-------|-------|------|
|                     | Max   | Min   | Mean  | STD  |
| Faba bean           | 27.00 | 22.80 | 26.48 | 1.05 | 32.19 | 26.84 | 27.77 | 1.21 | 27.91 | 23.69 | 26.87 | 0.69 | 31.82 | 22.71 | 26.93 | 2.29 |
| Narrow-leaved lupin | 37.30 | 22.73 | 28.36 | 5.41 | 34.16 | 27.98 | 30.53 | 2.27 | 23.67 | 8.85  | 17.41 | 6.02 | 27.11 | 23.95 | 25.22 | 1.22 |
| Turnip rape         | 31.18 | 29.35 | 30.49 | 0.70 | 34.38 | 30.89 | 32.93 | 1.33 | 33.66 | 30.84 | 32.07 | 1.04 | 31.61 | 28.78 | 30.28 | 1.01 |
| Oat                 | 55.13 | 50.22 | 53.54 | 1.96 | 53.18 | 51.86 | 52.47 | 0.47 | 58.73 | 56.26 | 57.28 | 1.03 | 51.15 | 49.61 | 50.17 | 0.59 |
| Barley              | 54.00 | 28.68 | 47.68 | 6.72 | 53.82 | 40.20 | 46.52 | 3.75 | 53.72 | 44.26 | 47.26 | 3.13 | 56.52 | 42.73 | 47.13 | 4.79 |
| Wheat               | 55.33 | 48.93 | 53.90 | 0.65 | 54.21 | 49.25 | 53.83 | 0.61 | 55.14 | 46.87 | 53.84 | 0.83 | 57.40 | 46.38 | 53.99 | 1.58 |
